# Supplementary material for: Phthalocyanine-based coordination polymer nanoparticles for enhanced photodynamic therapy
Source: Royal Society of Chemistry journal article supplement (doi:10.1039/c7nr05402e), 2017-01-01
Supplement: c7nr05402e1.pdf [file c7nr05402e1.pdf]

**Electronic Supplementary Information**

**Phthalocyanine-based coordination polymer nanoparticle for  
enhanced photodynamic therapy**

Ziyuan Huang <sup>a, b</sup>, Liangfeng Huang <sup>a</sup>, Yanjuan Huang <sup>a</sup>, Yuanfeng He <sup>a</sup>, Xiaoqi Sun <sup>a</sup>, Xiang Fu <sup>a</sup>, Xiaoyu Xu <sup>a</sup>, Gaofei Wei <sup>a</sup>, Dawei Chen <sup>b</sup>, Chunshun Zhao <sup>a, \*</sup>

<sup>a</sup> School of Pharmaceutical Sciences, Sun Yat-sen University, Guangzhou, People's Republic of China, 510006

<sup>b</sup> School of Pharmacy, Shenyang Pharmaceutical University, Liaoning, People's Republic of China, 110016

\*Corresponding author: Chunshun Zhao, Tel: +86 20 39943118; Fax: +86 20 39943118; E-mail address: zhaocs@mail.sysu.edu.cn.

## Supplementary caption

Scheme S1. Synthesis route of tetra(4-carboxyphenoxy)-phthalocyaninatozinc(II) (TPZnPc).

Fig. S1.  $^1\text{H}$  NMR spectra of 4-(4-carboxyphenoxy) phthalonitrile.

Fig. S2. ESI-MS spectra of 4-(4-carboxyphenoxy) phthalonitrile.

Fig. S3. IR spectra of 4-(4-carboxyphenoxy) phthalonitrile

Fig. S4.  $^1\text{H}$  NMR spectra of TPZnPc.

Fig. S5. MALDI-TOF-MS spectra of TPZnPc.

Fig. S6. IR spectra of TPZnPc.

Scheme S2. Synthesis route of DCA-Lys-Chol (DLC).

Fig. S7.  $^1\text{H}$  NMR spectra of LC.

Fig. S8. ESI-MS spectra of LC.

Fig. S9.  $^1\text{H}$  NMR spectra of DLC.

Fig. S10. ESI-MS spectra of DLC.

Fig. S11.  $^1\text{H}$  NMR spectra of PCPNs@DOPA and DOPA. The structural formula (inset) is DOPA molecule.

Fig. S12. Fluorescence emission spectrum of PCPNs@Lip/DLC at pH 7.4 and 6.5 in PBS.

Fig. S13. UV-vis absorption spectra changes of the  $^1\text{O}_2$  indicator ABDA mixed with (A) TPZnPc, (B) PCPNs@Lip and (C) PCPNs@Lip/DLC for different times under laser irradiation.

Fig. S14. The photostability of (A) TPZnPc, (B) PCPNs@Lip and (C) PCPNs@Lip/DLC.

Fig. S15. Photostability of TPZnPc, PCPNs@Lip and PCPNs@Lip/DLC in PBS.

Fig. S16. The stability of the PCPNs@Lip/DLC incubated with PBS (10% FBS). The sample solution was laser irradiated for 15 min at 4 h.

Fig. S17. UV-vis absorption spectra of PCPNs@Lip/DLC incubation with PBS at (A) pH 7.4, (B) pH 6.5 and (C) pH 5.0.

Fig. S18. Zeta potential variation of PCPNs@Lip/DLC at different pH values for 24 h.

Fig. S19. *In vitro* cytotoxicity of TPZnPc, PCPNs@Lip and PCPNs@Lip/DLC against MCF-7 cells without irradiation.

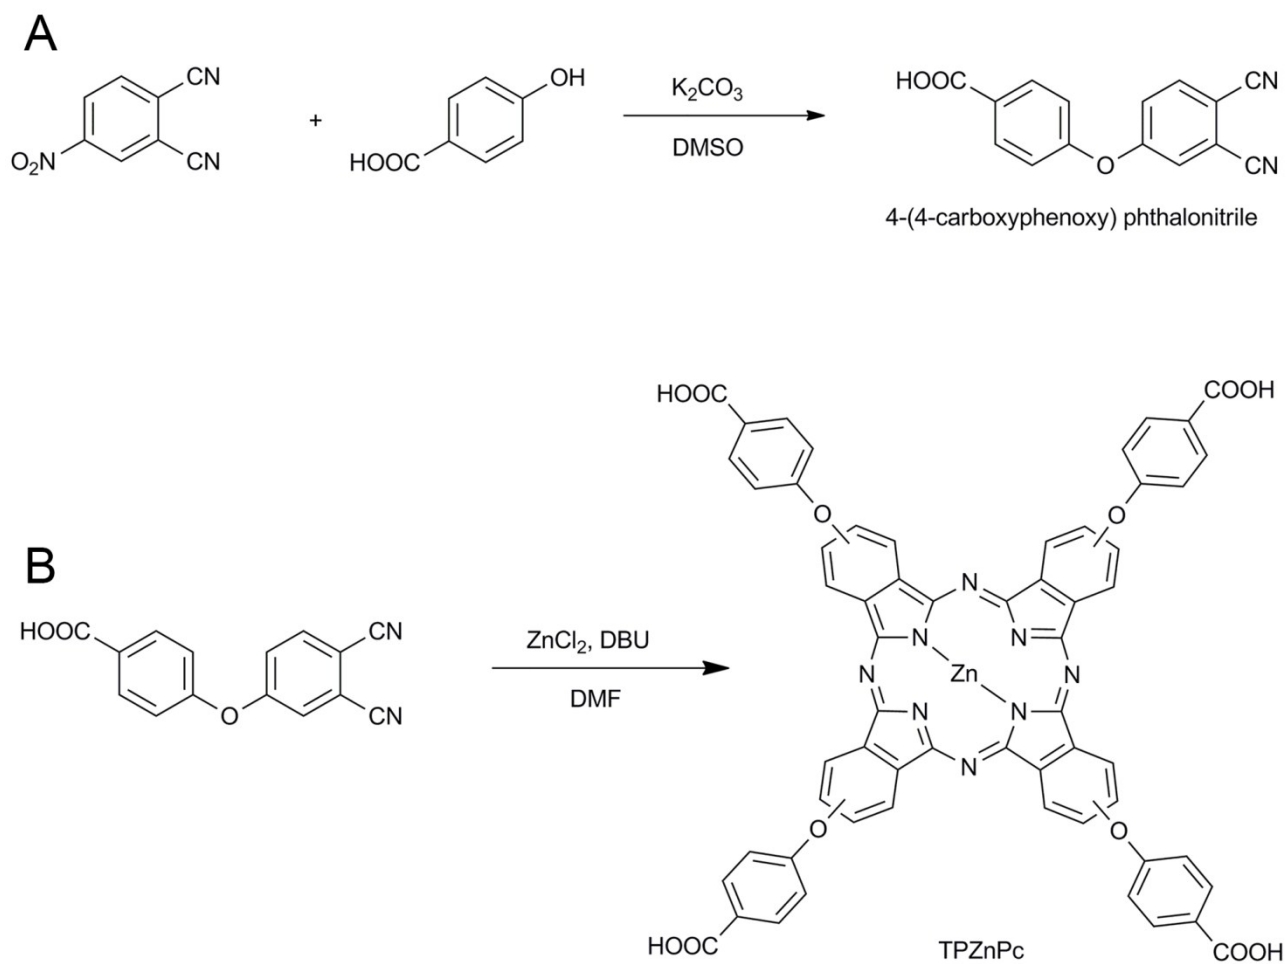

**Scheme S1.** Synthesis route of tetra(4-carboxyphenoxy)-phthalocyaninatozinc(II) (TPZnPc).

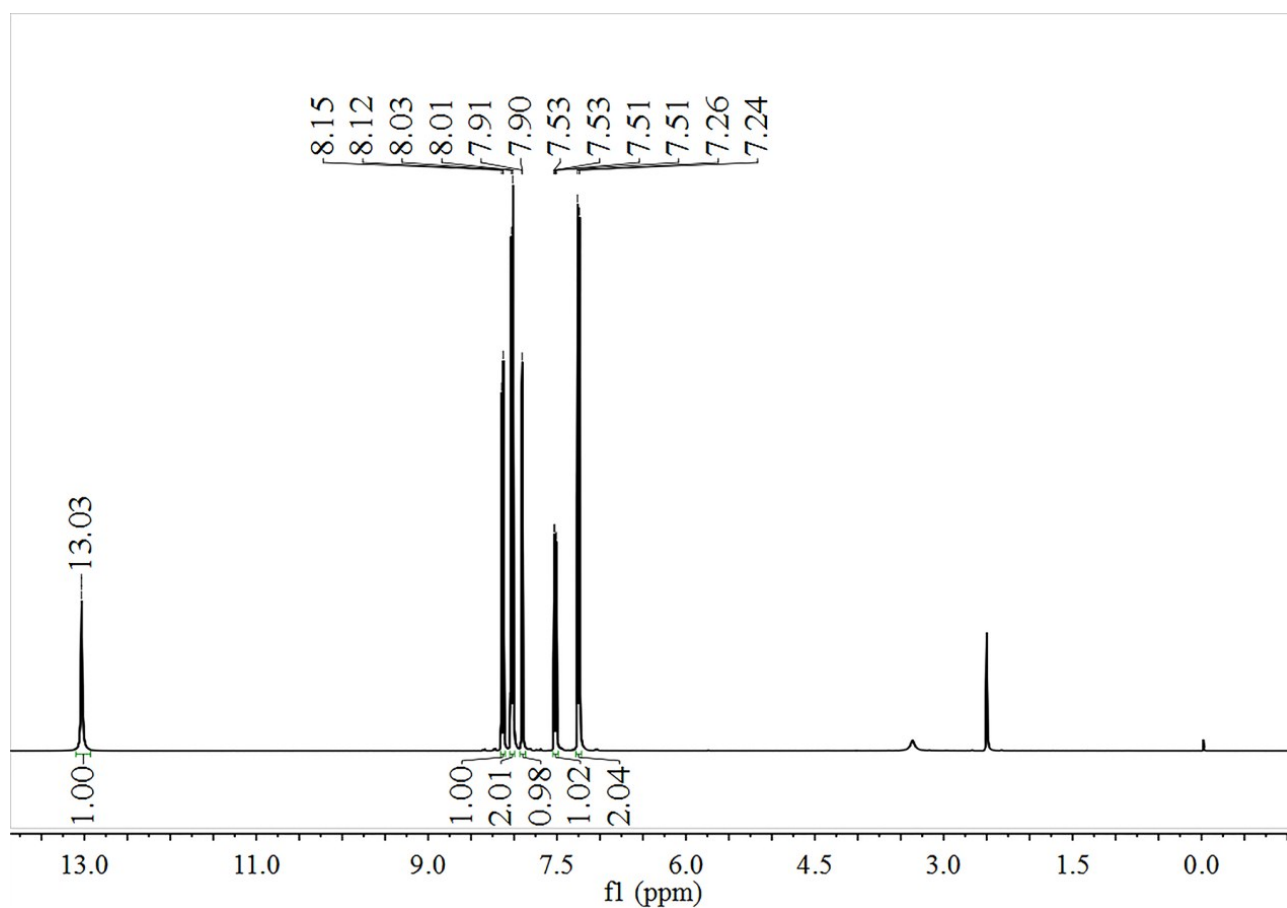

**Fig. S1.**  $^1\text{H}$  NMR spectra of 4-(4-carboxyphenoxy) phthalonitrile.

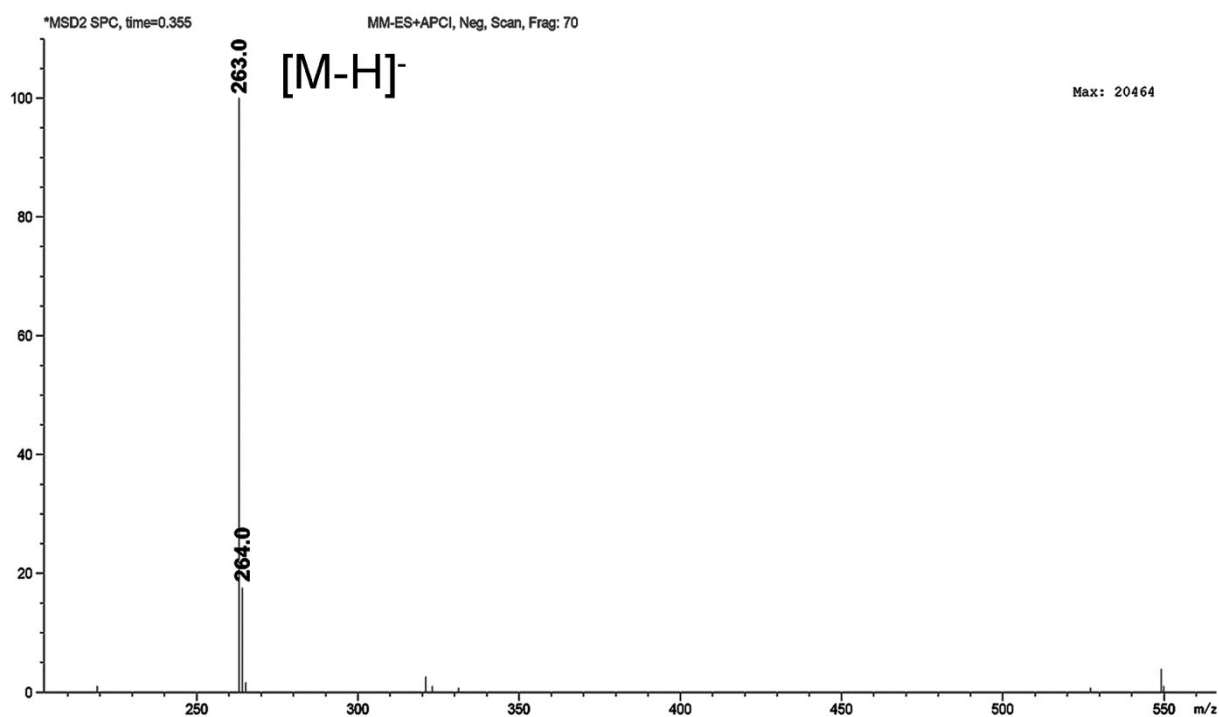

**Fig. S2.** ESI-MS spectra of 4-(4-carboxyphenoxy) phthalonitrile.

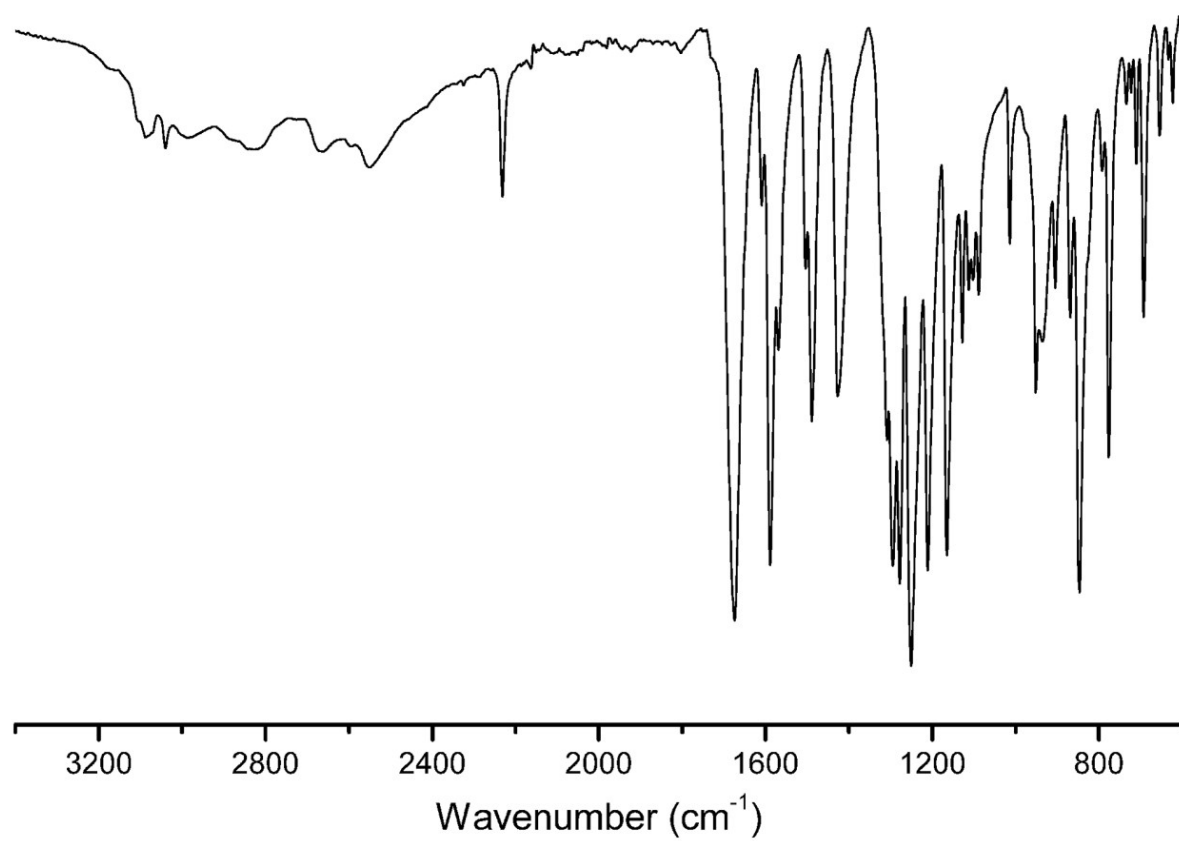

**Fig. S3.** IR spectra of 4-(4-carboxyphenoxy)phthalonitrile.

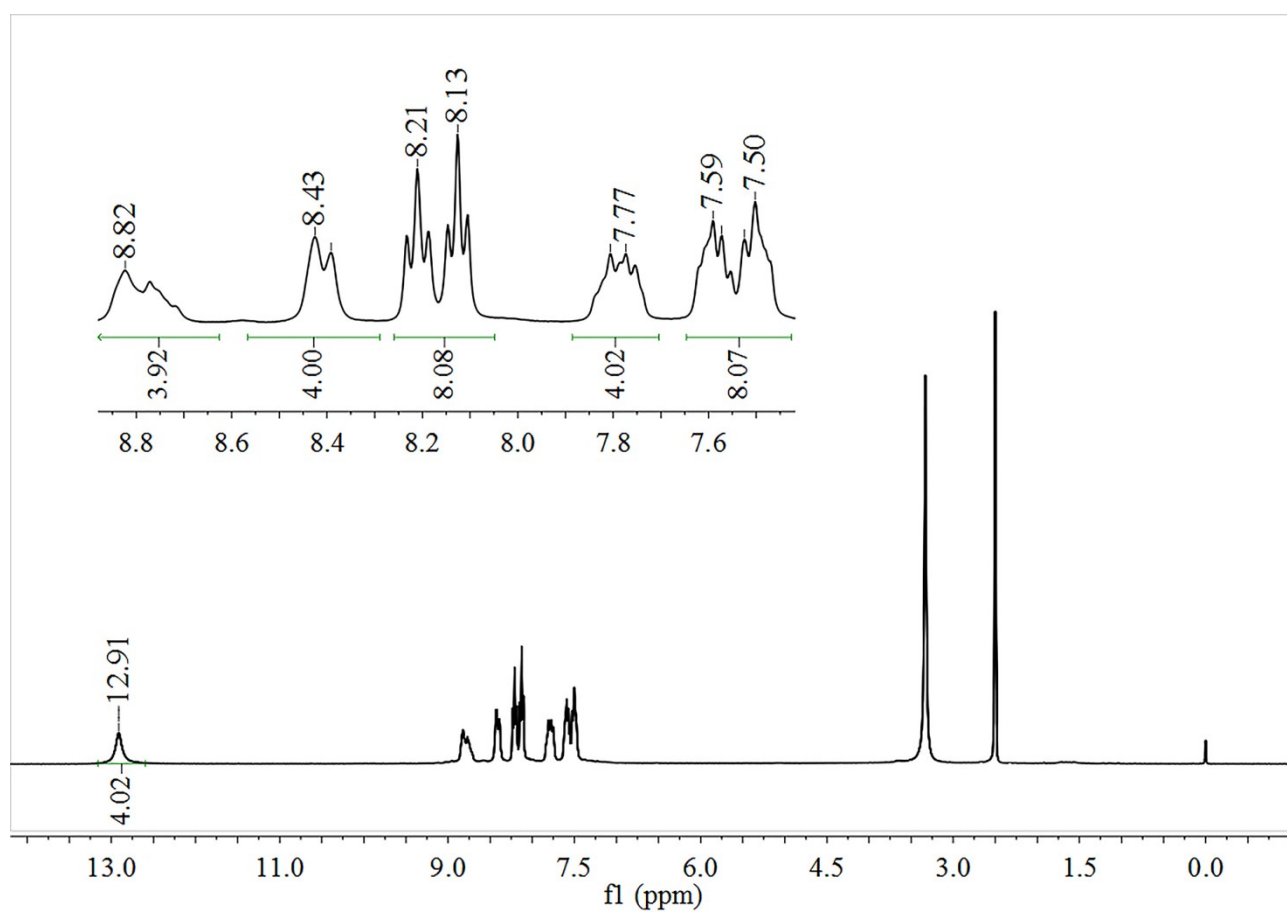

**Fig. S4.**  $^1\text{H}$  NMR spectra of TPZnPc.

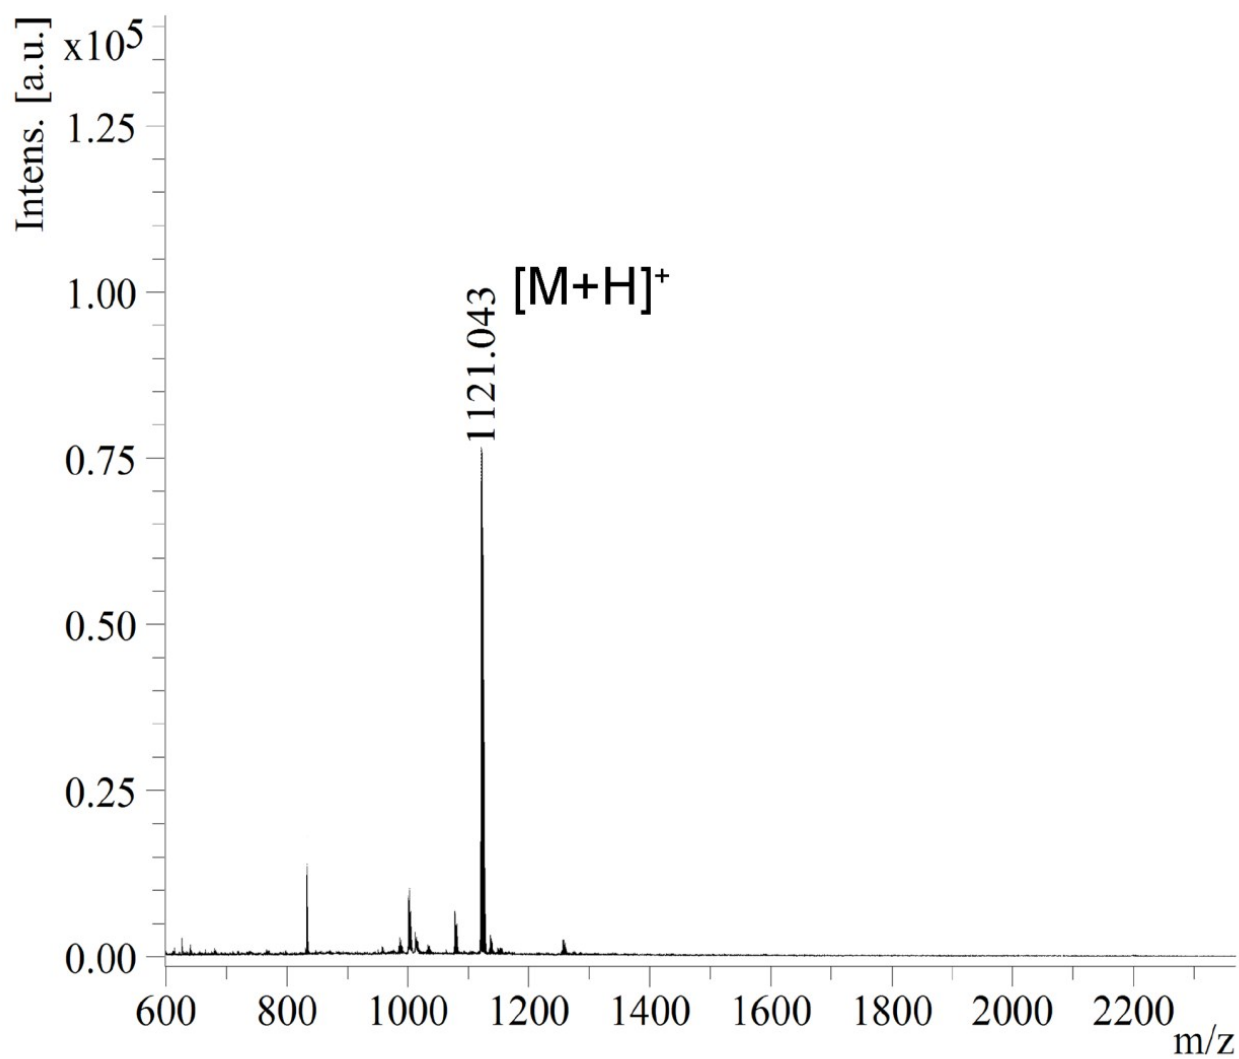

**Fig. S5.** MALDI-TOF-MS spectra of TPZnPc.

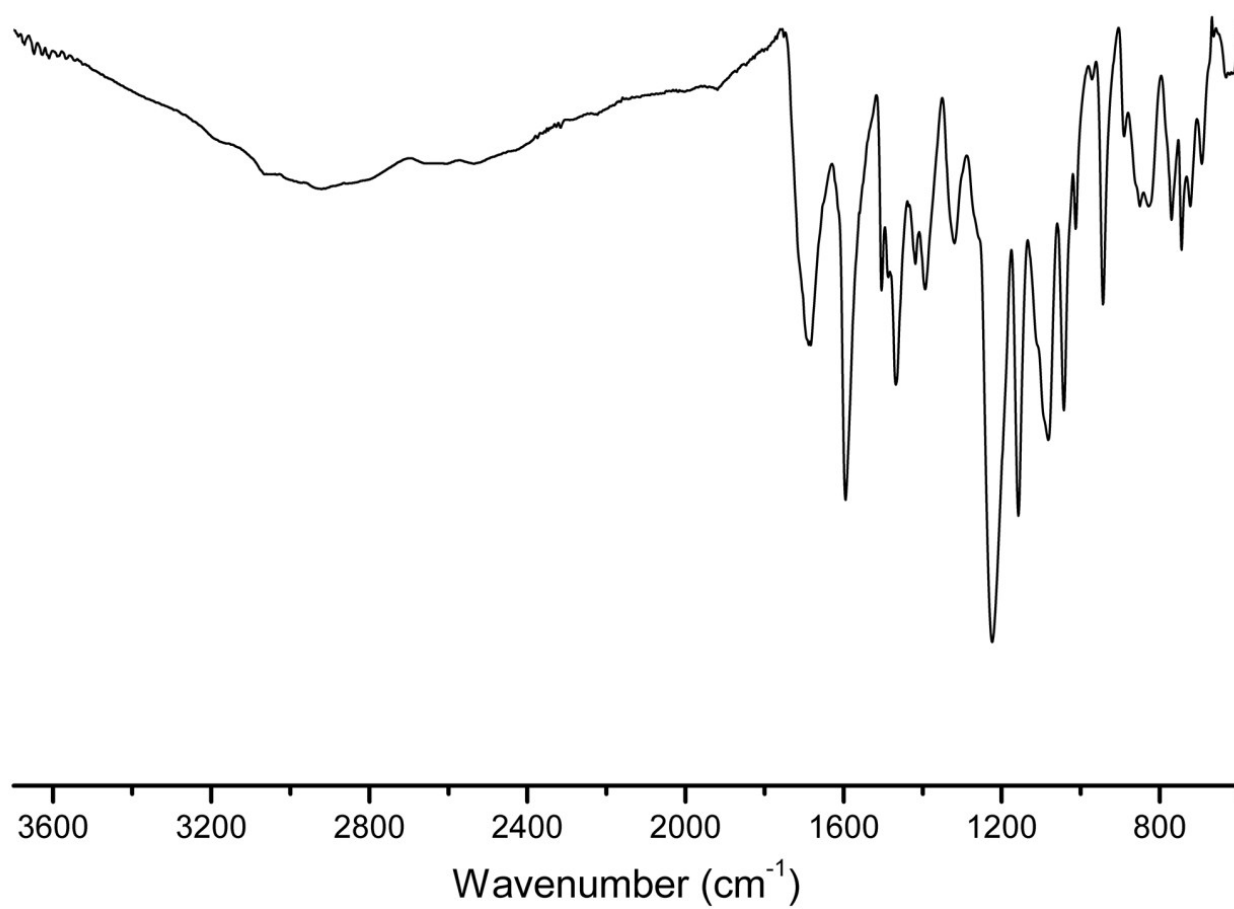

**Fig. S6.** IR spectra of TPZnPc.

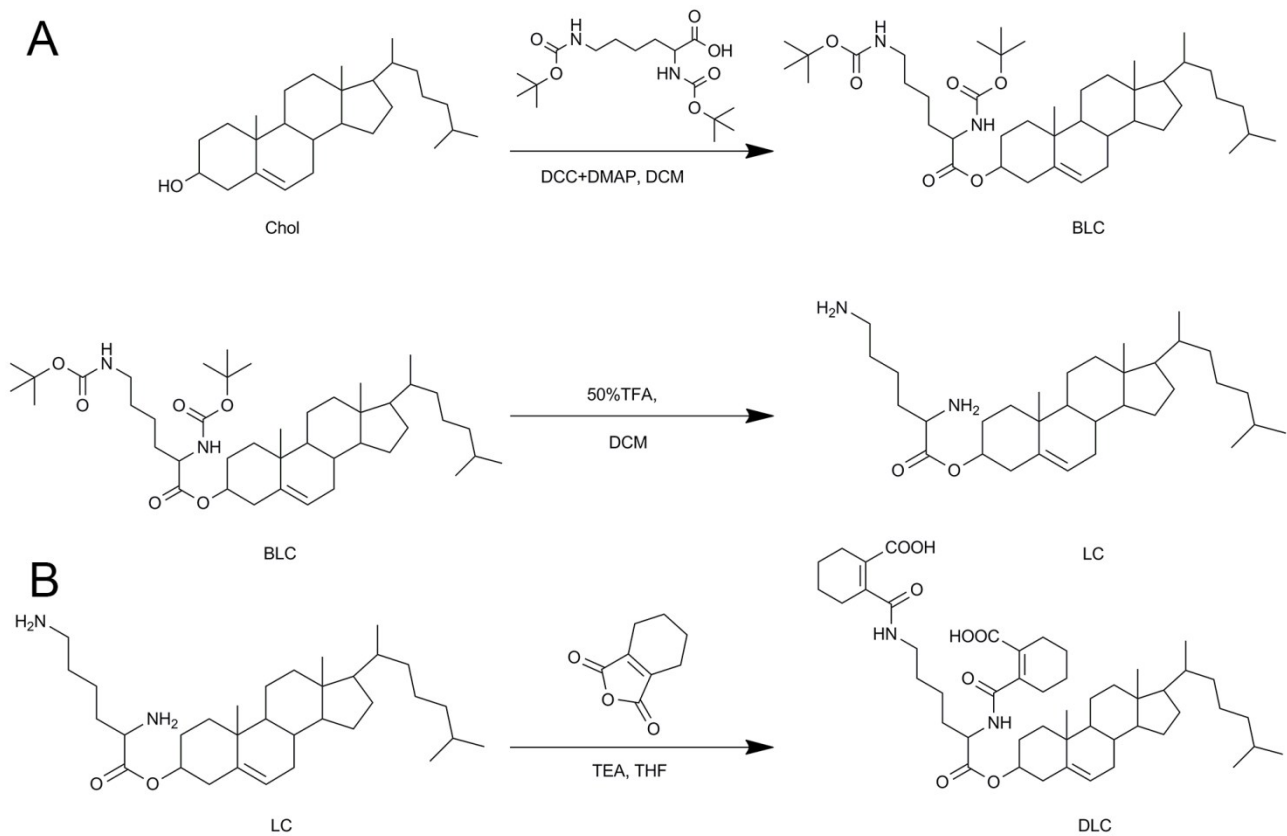

**Scheme S2.** Synthesis route of DCA-Lys-Chol (DLC).

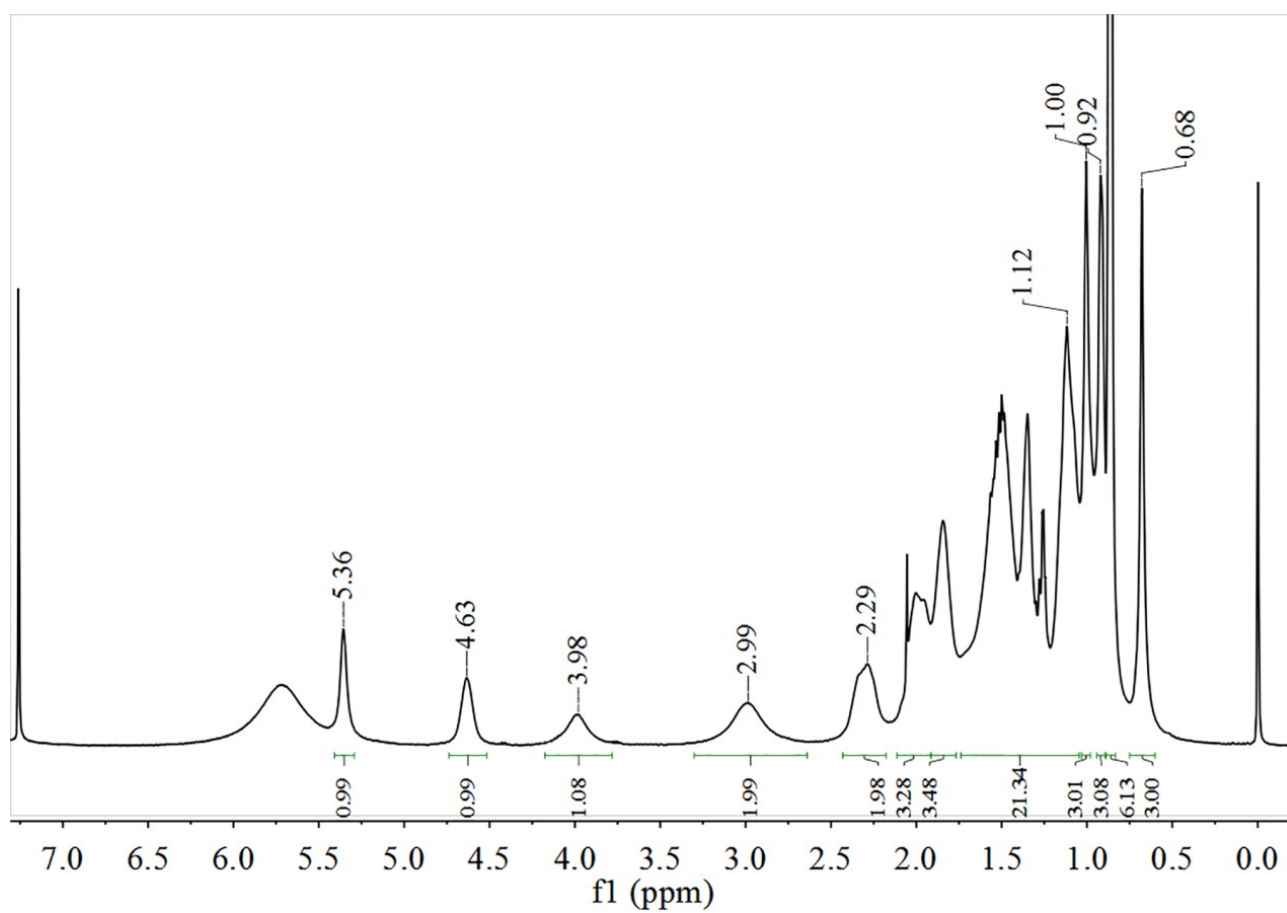

**Fig. S7.**  $^1\text{H}$  NMR spectra of LC.

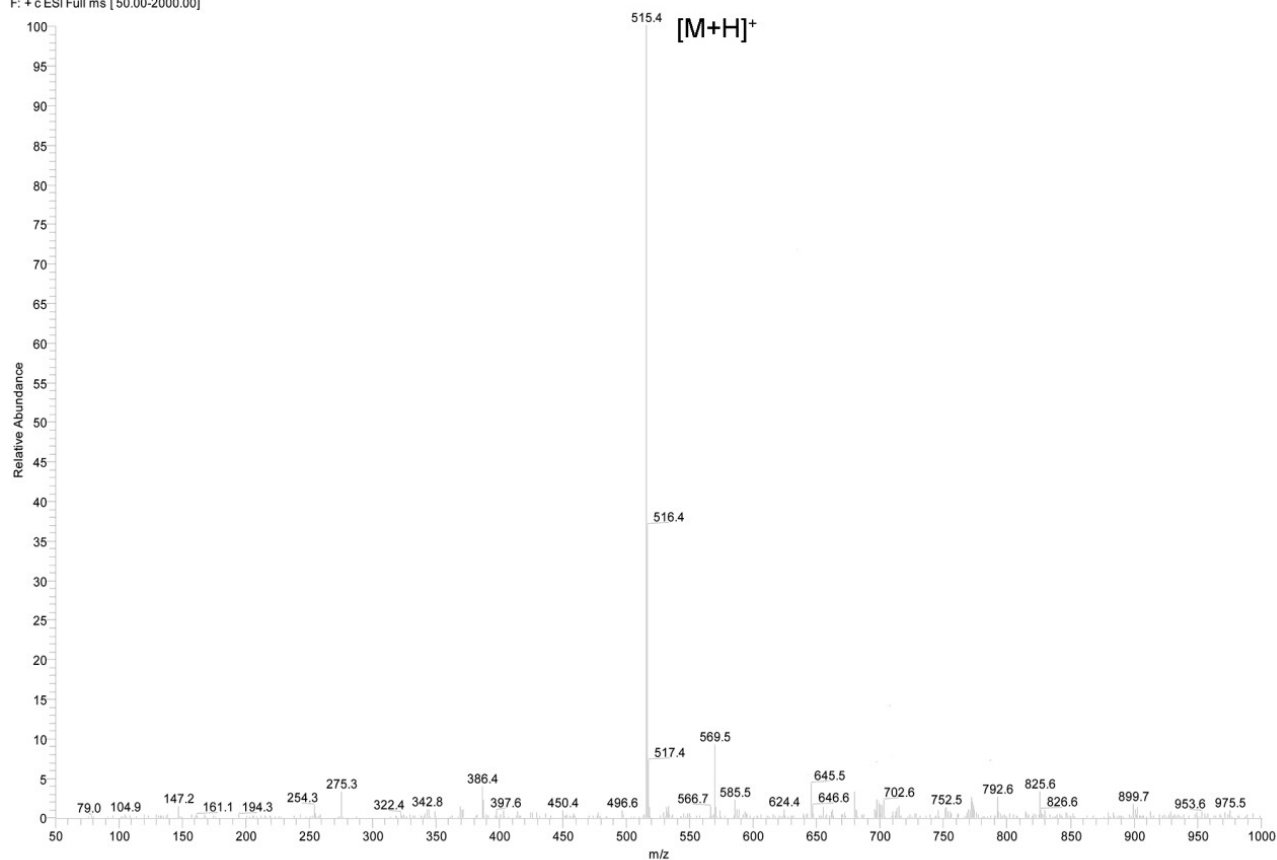

Fig. S8. ESI-MS spectra of LC.

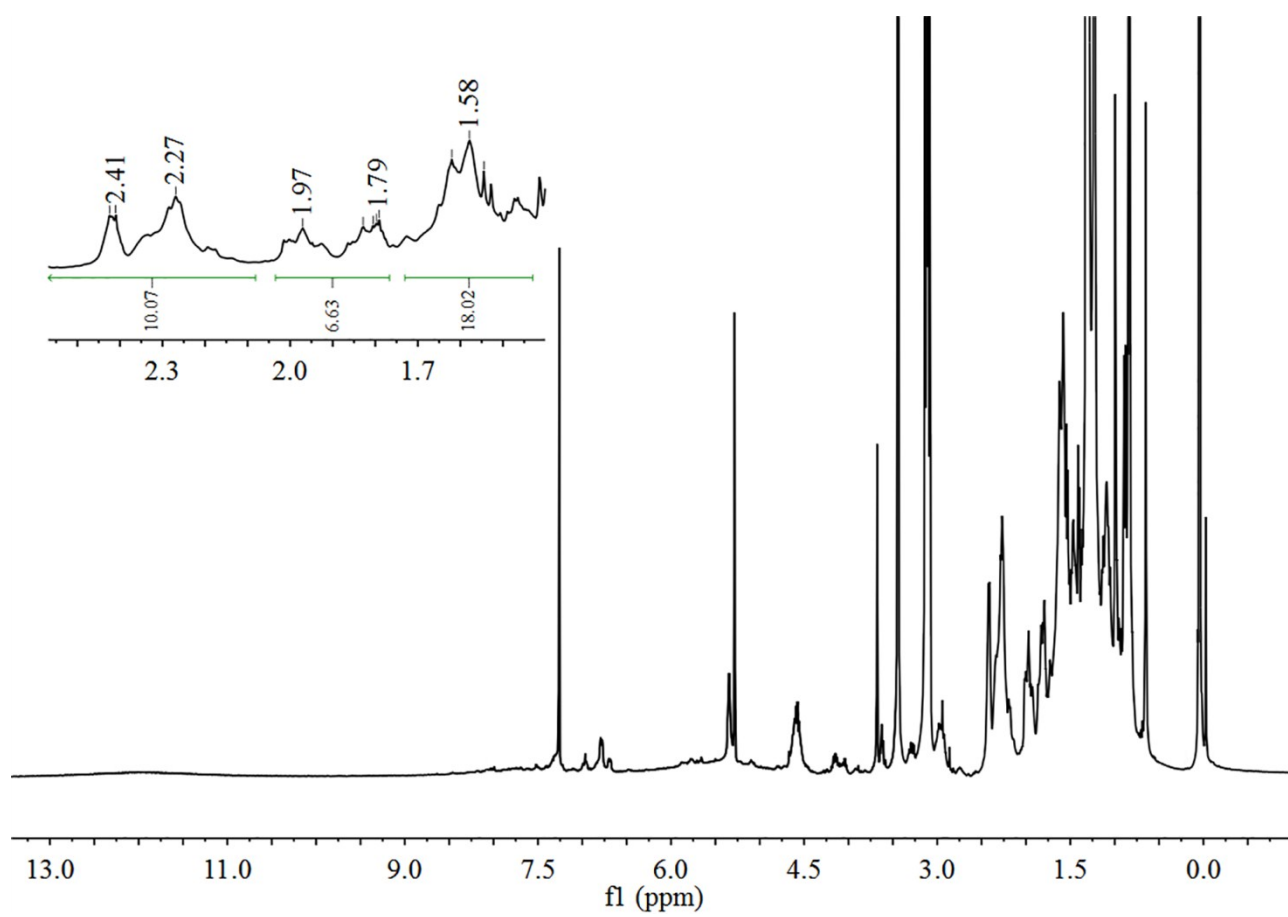

**Fig. S9.**  $^1\text{H}$  NMR spectra of DLC.

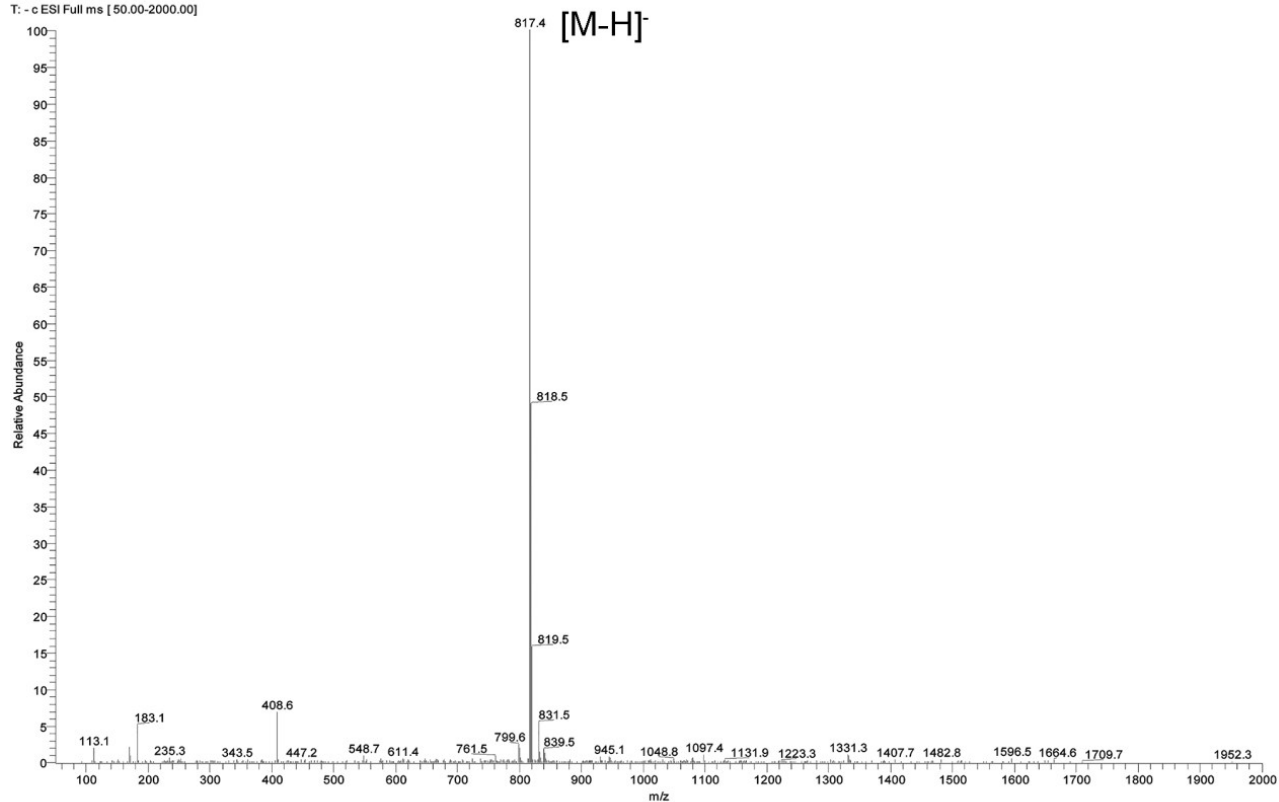

**Fig. S10.** ESI-MS spectra of DLC.

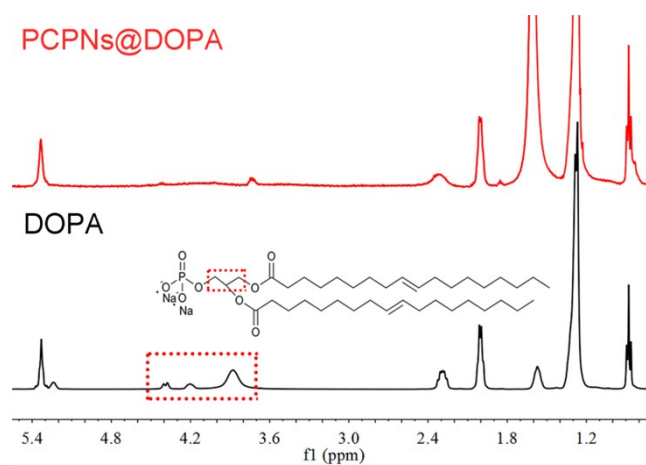

**Fig. S11.** <sup>1</sup>H NMR spectra of PCPNs@DOPA and DOPA. The structural formula (inset) is DOPA molecule.

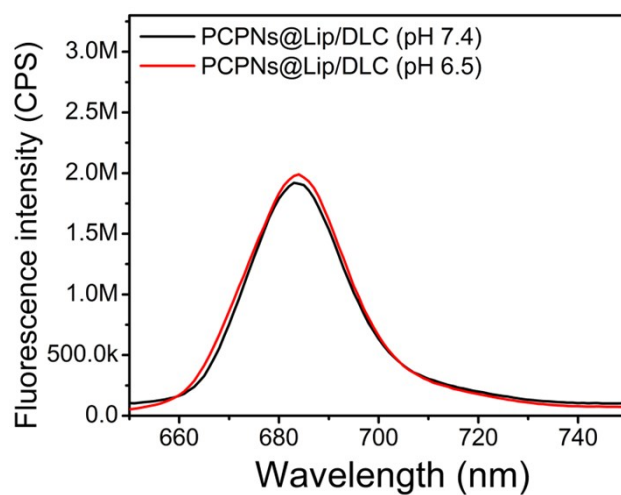

**Fig. S12.** Fluorescence emission spectrum of PCPNs@Lip/DLC at pH 7.4 and 6.5 in PBS.

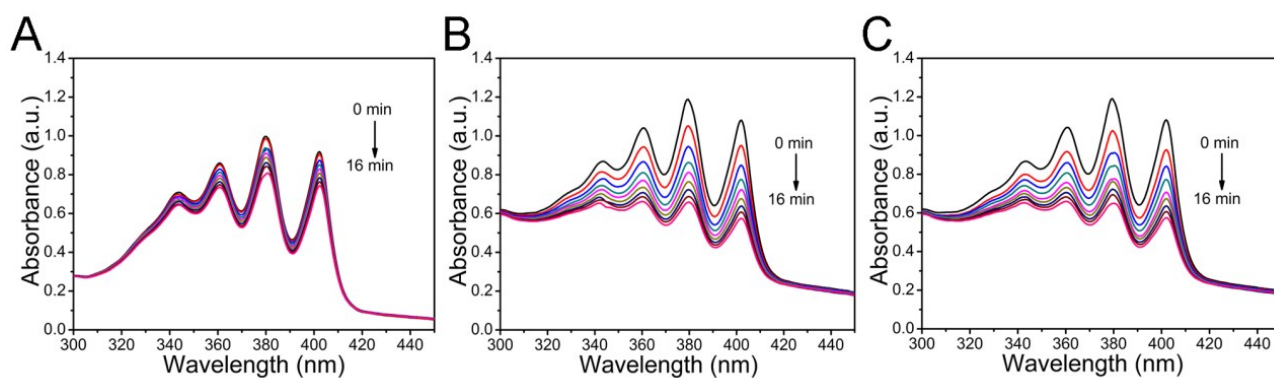

**Fig. S13.** UV-vis absorption spectra changes of the  $^1\text{O}_2$  indicator ABDA mixed with (A) TPZnPc, (B) PCPNs@Lip and (C) PCPNs@Lip/DLC for different times under laser irradiation.

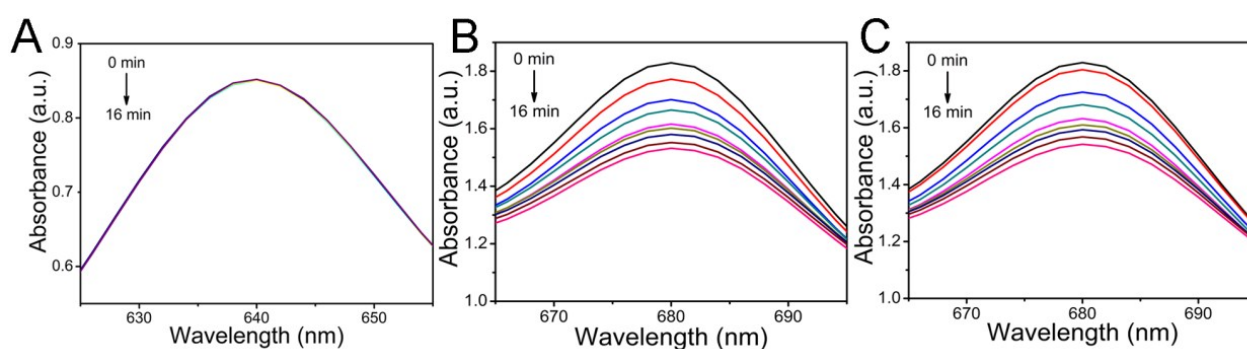

**Fig. S14.** The photostability of (A) TPZnPc, (B) PCPNs@Lip and (C) PCPNs@Lip/DLC.

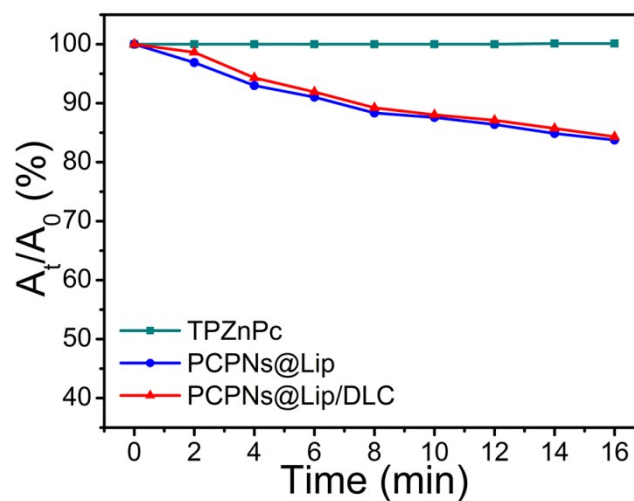

**Fig. S15.** Photostability of TPZnPc, PCPNs@Lip and PCPNs@Lip/DLC in PBS.

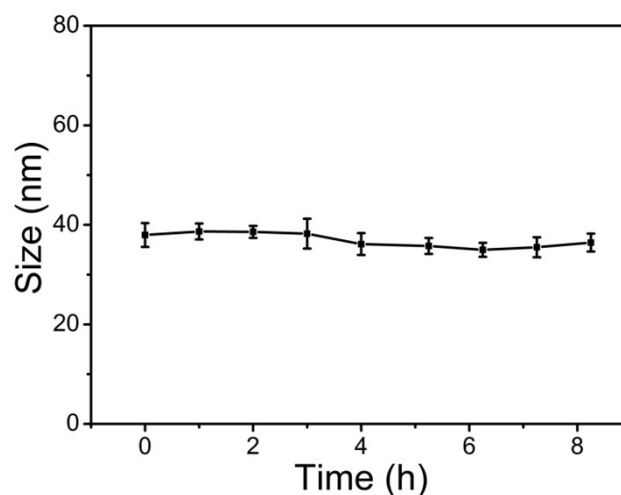

**Fig. S16.** The stability of the PCPNs@Lip/DLC incubated with PBS (10% FBS). The sample solution was laser irradiated for 15 min at 4 h.

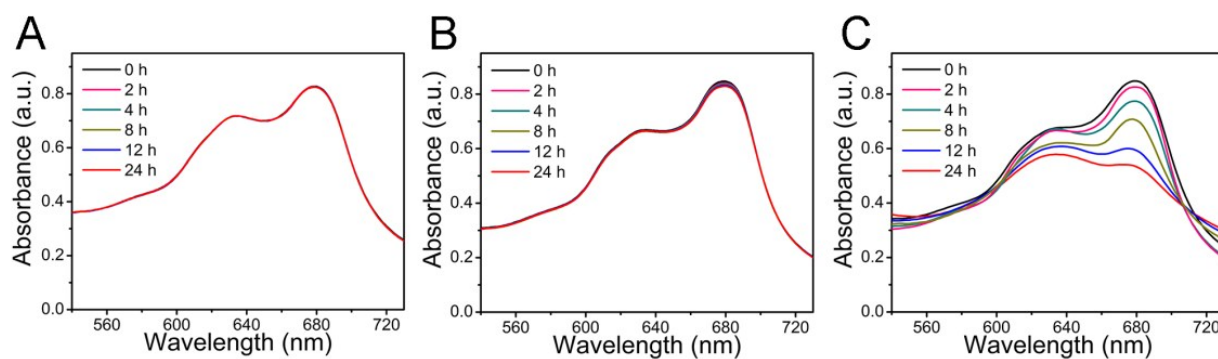

**Fig. S17.** UV-vis absorption spectra of PCPNs@Lip/DLC incubation with PBS at (A) pH 7.4, (B) pH 6.5 and (C) pH 5.0.

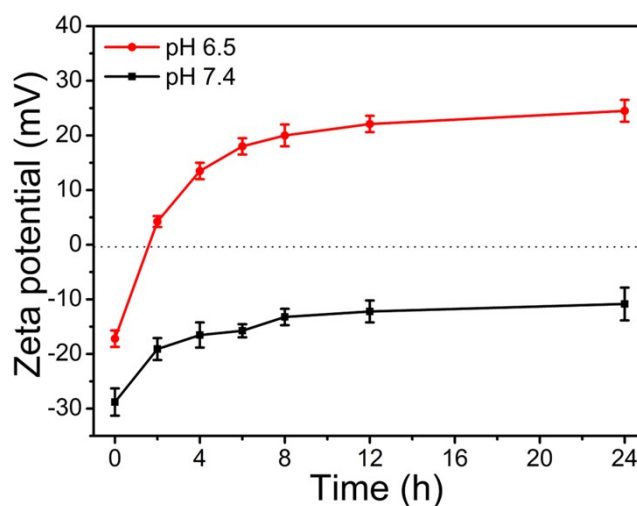

**Fig. S18.** Zeta potential variation of PCPNs@Lip/DLC at different pH values for 24 h.

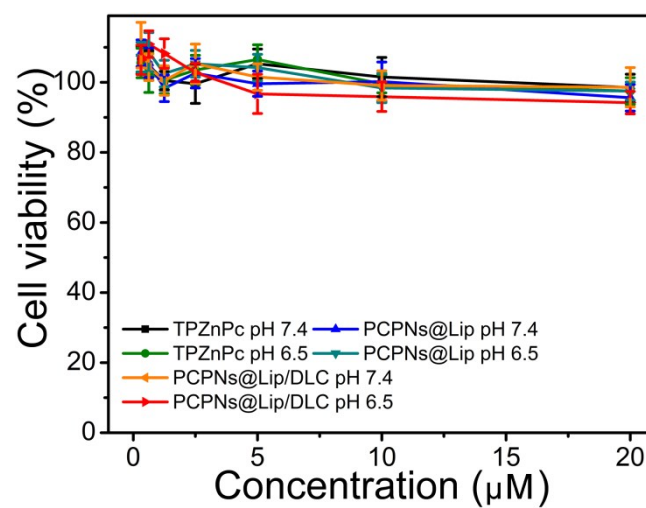

**Fig. S19.** *In vitro* cytotoxicity of TPZnPc, PCPNs@Lip and PCPNs@Lip/DLC against MCF-7 cells without irradiation.
